1  
2  
3  
4  
5  
6  
7  
8  
9  
10  
11  
12  
13  
14  
15  
16  
17  
18  
19  
20  
21  
22

# **Bayesian Inference of State-Level COVID-19 Basic Reproduction Numbers across the United States**

Abhishek Mallela<sup>a</sup>, Jacob Neumann<sup>b,1</sup>, Ely F. Miller<sup>b</sup>, Ye Chen<sup>c</sup>, Richard G. Posner<sup>b</sup>, Yen Ting Lin<sup>d</sup>, and William S. Hlavacek<sup>e,2\*</sup>

<sup>a</sup>Department of Mathematics, University of California, Davis, CA 95616

<sup>b</sup>Department of Biological Sciences, Northern Arizona University, Flagstaff, AZ 86001

<sup>c</sup>Department of Mathematics and Statistics, Northern Arizona University, Flagstaff, AZ 86001

<sup>d</sup>Computer, Computational and Statistical Sciences Division, Los Alamos National Laboratory, Los Alamos, NM 87545

<sup>e</sup>Theoretical Division, Los Alamos National Laboratory, Los Alamos, NM 87545

<sup>1</sup>Current address: Department of Chemistry and Chemical Biology, Cornell University, Ithaca, NY 14853

<sup>2</sup>To whom correspondence may be addressed. Email: [wish@lanl.gov](mailto:wish@lanl.gov)

## **Biological Sciences: Population Biology**

**mathematical model | coronavirus disease 2019 (COVID-19) | basic reproduction number | herd immunity | Bayesian inference**

## 23 **Abstract**

24 Although many persons in the United States have acquired immunity to COVID-19, either through  
25 vaccination or infection with SARS-CoV-2, COVID-19 will pose an ongoing threat to non-immune  
26 persons so long as disease transmission continues. We can estimate when sustained disease transmission  
27 will end in a population by calculating the population-specific basic reproduction number  $\mathcal{R}_0$ , the expected  
28 number of secondary cases generated by an infected person in the absence of any interventions. The value  
29 of  $\mathcal{R}_0$  relates to a herd immunity threshold (HIT), which is given by  $1 - 1/\mathcal{R}_0$ . When the immune fraction  
30 of a population exceeds this threshold, sustained disease transmission becomes exponentially unlikely  
31 (barring mutations allowing SARS-CoV-2 to escape immunity). Here, we report state-level  $\mathcal{R}_0$  estimates  
32 obtained using Bayesian inference. Maximum *a posteriori* estimates range from 7.1 for New Jersey to 2.3  
33 for Wyoming, indicating that disease transmission varies considerably across states and that reaching herd  
34 immunity will be more difficult in some states than others.  $\mathcal{R}_0$  estimates were obtained from  
35 compartmental models via the next-generation matrix approach after each model was parameterized using  
36 regional daily confirmed case reports of COVID-19 from 21-January-2020 to 21-June-2020. Our  $\mathcal{R}_0$   
37 estimates characterize infectiousness of ancestral strains, but they can be used to determine HITs for a  
38 distinct, currently dominant circulating strain, such as SARS-CoV-2 variant Delta (lineage B.1.617.2), if  
39 the relative infectiousness of the strain can be ascertained. On the basis of Delta-adjusted HITs,  
40 vaccination data, and seroprevalence survey data, we find that no state has achieved herd immunity as of  
41 20-September-2021.

42

43

44

45

46

## 47 **Significance Statement**

48 COVID-19 will continue to threaten non-immune persons in the presence of ongoing disease transmission.  
49 We can estimate when sustained disease transmission will end by calculating the population-specific basic  
50 reproduction number  $\mathcal{R}_0$ , which relates to a herd immunity threshold (HIT), given by  $1 - 1/\mathcal{R}_0$ . When  
51 the immune fraction of a population exceeds this threshold, sustained disease transmission becomes  
52 exponentially unlikely. Here, we report state-level  $\mathcal{R}_0$  estimates indicating that disease transmission varies  
53 considerably across states. Our  $\mathcal{R}_0$  estimates can also be used to determine HITs for the Delta variant of  
54 COVID-19. On the basis of Delta-adjusted HITs, vaccination data, and serological survey results, we find  
55 that no state has yet achieved herd immunity.

56

57

58

59

60

61

62

63

64

65

66

67

## 68 **Introduction**

69 Vaccines to protect against coronavirus disease 2019 (COVID-19) became available in the United  
70 States (US) in December 2020 (1). As of September 20, 2021, 181,728,072 persons have been fully  
71 vaccinated, an additional 30,307,256 persons have been partially vaccinated, and an uncertain number of  
72 persons have acquired immunity through infection (2). The entire US population does not need to be  
73 vaccinated to end sustained COVID-19 transmission because of the phenomenon of herd immunity (3),  
74 which is reached when a critical fraction of the population becomes immune. This fraction is called the  
75 herd immunity threshold (HIT).

76 The HIT for a population relates to the basic reproduction number,  $\mathcal{R}_0$ , as follows (3):  $\text{HIT} = 1 -$   
77  $1/\mathcal{R}_0$ .  $\mathcal{R}_0$  is defined as the expected number of secondary infections arising from a primary case in the  
78 absence of any immunity or intervention. As is well known,  $\mathcal{R}_0$  and HIT are population-specific (4-5),  
79 which means that the effort required to control the local COVID-19 epidemic may vary from community  
80 to community. However, knowledge of the HIT for a given region is insufficient to determine when  
81 disease transmission within the region will end. One also needs to know the fraction of the population that  
82 has immunity. Estimating the immune fraction is difficult, because we cannot simply count the number of  
83 persons who have been vaccinated or the number of persons detected to be infected. Immunity is acquired  
84 not only through vaccination but also through infection (6), and case detection is imperfect. Insight into  
85 the immune fraction can be obtained from seroprevalence surveys, which use blood tests to identify  
86 persons who have antibodies against the SARS-CoV-2 virus (acquired through vaccination or infection).

87 Various estimates of  $\mathcal{R}_0$  for transmission of COVID-19 have been provided in the literature (7).  
88 The estimates that have received the most attention are those given for China and Italy (8-12), which were  
89 among the first regions to be impacted by COVID-19. However, the relevance of these estimates for

90 populations within the US (or elsewhere outside of China and Italy) is unclear. Several studies have  
91 estimated  $\mathcal{R}_0$  for the US at the national level (13-15), the state level (16-18), and the county level (19-20).  
92 The usefulness of a national estimate is unclear given the heterogeneity of the US, and none of the county-  
93 level estimates are comprehensive. Some state-level estimates are also incomplete (16, 18). Because  
94 responses to COVID-19 within the US have been and continue to be driven mainly by governors of US  
95 states (21), we undertook a study to generate comprehensive state-level  $\mathcal{R}_0$  estimates through Bayesian  
96 inference. With this approach, we were able to quantify uncertainty in each estimate through a parameter  
97 posterior distribution.

98 In earlier work, we developed a compartmental model for COVID-19 transmission dynamics that  
99 reproduces surveillance data and generates accurate forecasts for the 15 most populous metropolitan  
100 statistical areas (MSAs) in the US (22). Here, for each of the 50 states, we found a state-specific parameter  
101 posterior conditioned on this model from state-level COVID-19 surveillance data available from January  
102 21 to June 21, 2020 (23). From these parameter posteriors, we then obtained region-specific  $\mathcal{R}_0$  and HIT  
103 posteriors and maximum *a posteriori* (MAP) estimates. The MAP estimates for HITs together with other  
104 data—vaccination tracking data (24), serological survey data (25-26), and quantitative estimates of the  
105 increased transmissibility of the recently introduced SARS-CoV-2 variant Delta (lineage B.1.617.2) (27-  
106 28)—provide insight into the progress of each state toward herd immunity.

## 107 **Materials and Methods**

### 108 **Model**

109 To obtain regional  $\mathcal{R}_0$  and HIT estimates, we used a compartmental model developed previously  
110 (22). We found region-specific parameterizations that allow the model to reproduce surveillance data  
111 (daily reports of new confirmed COVID-19 cases) available for each region of interest over a defined  
112 period (e.g., January 21 to June 21, 2020). The model is able to account for a variable number of social-

113 distancing periods. We considered versions of the model accounting for one, two, and three social-  
114 distancing periods. The number of social-distancing periods deemed best (i.e., to provide the most  
115 parsimonious explanation of the data) for a given time period was determined using the model selection  
116 procedure described by Lin et al. (22). As in the study of Lin et al. (22), the model has 14 parameters with  
117 universal fixed values (applicable to all regions). The model also has  $3(n + 1) + 3$  parameters with  
118 region-specific adjustable values determined through Bayesian inference, where  $n + 1$  denotes the  
119 number of social-distancing periods. In this study, for a given region, we censored case-reporting data  
120 whenever the cumulative reported case count was less than 10 cases. We also specified the onset time of  
121 the first social-distancing period as the earliest day on which the cumulative reported case count was 200  
122 cases or more. A full description of model parameters is given in Lin et al. (22).

## 123 **Simulations**

124 Each region-specific model consists of a coupled system of ordinary differential equations (ODEs),  
125 which are given by Lin et al. (22). The ODEs were numerically integrated using the SciPy (29) interface  
126 to LSODA (30) and the BioNetGen (31) interface to CVODE (32). Python code was converted to machine  
127 code using Numba (33). The initial conditions were determined as in Lin et al. (22).

## 128 **Calculation of epidemic parameters $\mathcal{R}_0$ and $\lambda$**

129 To find the basic reproduction number  $\mathcal{R}_0$ , we considered a reduced form of the model of Lin et  
130 al. (22), which is given in Eqs. 1-8 of the Supplementary Information (SI). The reduced model omits  
131 consideration of interventions, including social distancing, quarantine, and self-isolation, which are all  
132 considered in the full model. From the reduced model, we derived an expression for  $\mathcal{R}_0$  by applying the  
133 next-generation matrix method (34). In this procedure,  $\mathcal{R}_0$  is determined as the spectral radius of the so-  
134 called next-generation matrix. Denoting this matrix as  $\mathcal{N}$ , the  $(i, j)$  entry of  $\mathcal{N}$  is the expected number of  
135 new infections in the  $i^{th}$  compartment produced by persons initially in the  $j^{th}$  compartment. The

136 expression for  $\mathcal{R}_0$  given in the Results section below was obtained using Mathematica (35). The matrix  
137  $\mathcal{N}$  was obtained using Mathematica's *LinearSolve* function and  $\mathcal{R}_0$  was computed as the dominant  
138 eigenvalue of  $\mathcal{N}$ .

139 To characterize the initial rate of exponential growth for a local epidemic within a given region,  
140 we computed the epidemic growth rate  $\lambda$  as the dominant eigenvalue of the Jacobian of the reduced model  
141 linearized at the disease-free equilibrium (36). The derivation of  $\lambda$  is provided in the SI.

## 142 **Bayesian inference**

143 To infer region-specific values of adjustable model parameters (and  $\mathcal{R}_0$  and HIT estimates), we  
144 followed the Bayesian inference approach of Lin et al. (22). In inferences, we used all region-relevant  
145 confirmed COVID-19 case-count data available in the GitHub repository maintained by *The New York*  
146 *Times* newspaper (23) for the period starting on 21-January-2020 and ending on 21-May-2020, 21-June-  
147 2020, or 21-July-2020 (inclusive dates). Markov Chain Monte Carlo (MCMC) sampling was performed  
148 using the Python code of Lin et al. (22) and a new release of PyBioNetFit (37), version 1.1.9, which  
149 includes an implementation of the adaptive MCMC method used in the study of Lin et al. (22). Inference  
150 job setup files for PyBioNetFit, including data files, are provided for each of the 50 states online  
151 (<https://github.com/lanl/PyBNF/tree/master/examples/Mallela2021States>). Results from both methods  
152 were found to be consistent (SI Fig S1). To ensure that MCMC sampling procedures converged, we  
153 visually inspected trace plots for log-likelihood (SI Fig S2) and parameters (SI Fig S3) and pairs plots (SI  
154 Fig S4). We also performed simulations using maximum likelihood estimates (MLEs) for parameter  
155 values to assess agreement of the simulations with the training data (SI Fig S5).

156 The maximum *a posteriori* (MAP) estimate of a parameter is the value of the parameter  
157 corresponding to the peak of its marginal posterior distribution, where probability density is highest.

158 Because we assumed a proper uniform prior distribution for each of the adjustable parameters, as in the  
159 study of Lin et al. (22), the MAP estimates are MLEs.

## 160 **Results**

### 161 **Bayesian uncertainty quantification**

162 Following the Bayesian inference approach of Lin et al. (22), we quantified uncertainty in  
163 predicted trajectories of confirmed case counts for all 50 states, using data from January 21 to June 21,  
164 2020. As illustrated in Fig 1 for the states of New Jersey, Wyoming, Florida, and Alaska, we find that  
165 each region-specific model parameterized on the basis of our MCMC sampling procedure reproduces the  
166 corresponding surveillance data over the period of interest. Results for the remaining states are shown in  
167 SI Fig S5. At the end of each MCMC sampling procedure, we obtained a marginal posterior distribution  
168 for  $\beta$  (the rate constant in the model for disease transmission) which provides a probabilistic  
169 characterization of region-specific SARS-CoV-2 transmissibility. If the marginal posterior is narrow, we  
170 have high confidence in the MAP estimate of  $\beta$ ; if it is wide, we have less confidence in its value. Each  
171 state-specific marginal posterior yields a MAP estimate for  $\beta$ .

172 We can propagate the uncertainty in  $\beta$  into uncertainty in  $\mathcal{R}_0$  and HIT estimates, using the formula  
173 for  $\mathcal{R}_0$  given below and  $\text{HIT} = 1 - 1/\mathcal{R}_0$ . In Fig 2, we show marginal posterior distributions for  $\mathcal{R}_0$  and  
174 HIT for the states of New Jersey, Wyoming, Florida, and Alaska. We provide MAP estimates of the model  
175 parameters for all states in SI Table S1. Model parameters were found to be identifiable in practice. (We  
176 have no proof of identifiability.) MAP estimates for  $\mathcal{R}_0$  and HIT for all 50 states are provided in SI Table  
177 S2. These tables also provide 95% credible intervals. These estimates characterize the infectiousness of  
178 SARS-CoV-2 ancestral strains in each region of interest.

### 179 **Region-specific basic reproduction numbers and herd immunity thresholds**



180 To calculate the herd immunity threshold (HIT) for a specific region, we need to know the  
181 corresponding region-specific value of the basic reproduction number  $\mathcal{R}_0$ , which is given by the following  
182 formula (obtained as described in Materials and Methods and SI):

$$183 \quad \mathcal{R}_0 = \beta \times \left( \frac{1-f_A}{c_I} + \frac{f_A \rho_A}{c_A} + \frac{(m-1)\rho_E}{k_L} \right) \quad [1]$$

184 where  $\beta$  characterizes the rate of transmission attributable to contacts between persons who are not  
185 protected by social distancing,  $f_A$  denotes the fraction of infected persons who never develop symptoms  
186 (i.e., the fraction of asymptomatic cases),  $c_A$  characterizes the rate at which asymptomatic persons recover  
187 during the immune clearance phase of infection,  $c_I$  characterizes the rate at which symptomatic persons  
188 with mild disease recover or progress to severe disease,  $\rho_E$  is a constant characterizing the relative  
189 infectiousness of presymptomatic persons compared to symptomatic persons (with the same behaviors),  
190  $\rho_A$  is a constant characterizing the relative infectiousness of asymptomatic persons compared to  
191 symptomatic persons (with the same behaviors),  $m$  denotes the number of stages in the incubation period,  
192 and  $k_L$  characterizes disease progression, from one stage of the incubation period to the next and ultimately  
193 to an immune clearance phase. The value of  $\mathcal{R}_0$  depends on one inferred region-specific parameter,  $\beta$ , and  
194 seven fixed parameters, which have values taken to be applicable for all regions (i.e.,  $f_A, c_A, c_I, \rho_E, \rho_A, k_L,$   
195 and  $m$ ). Estimates of these fixed parameters were taken from Lin et al. (22).

196 The SARS-CoV-2 variant Delta (lineage B.1.617.2) has been estimated to be 1.64 times more  
197 infectious than variant Alpha (lineage B.1.1.7) (28), which has been estimated to be 1.50 times more  
198 infectious than ancestral strains (27). Assuming that Delta is the dominant circulating SARS-CoV-2 strain  
199 throughout the US (as of September 20, 2021) and that  $\beta$  for Delta is  $1.64 \times 1.50 = 2.46$  times greater  
200 than  $\beta$  for ancestral strains (with other parameters in Eq. 1 remaining the same), the MAP estimate of the  
201 Delta-adjusted  $\mathcal{R}_0$  ranges from 5.6 for Wyoming to 18 for New Jersey (from the multiplier given above  
202 and SI Table S2). The population-weighted Delta-adjusted  $\mathcal{R}_0$  for the US is 12. These estimates indicate

203 that the herd immunity threshold (HIT) for the Delta variant of SARS-CoV-2 ranges from 82% to 94%.

#### 204 **Estimates of initial region-specific epidemic growth rates**

205 HIT estimates are directly determined by estimates of the basic reproduction number, which are  
206 related to the initial growth rate of the epidemic in a given region. Here, our  $\mathcal{R}_0$  estimates are conditioned  
207 on a compartmental model that has been parameterized to reproduce case-reporting data available for each  
208 region over a five-month period (January 21 to June 21, 2020). We can use parameter estimates obtained  
209 for each region to calculate the initial epidemic growth rate  $\lambda$ , which is directly comparable to early  
210 surveillance data (Fig 3 and SI Fig S6). We provide MAP estimates and 95% credible intervals for  $\lambda$ ,  $\mathcal{R}_0$ ,  
211 and HIT for selected states in Table 1. MAP estimates and 95% credible intervals for  $\lambda$ ,  $\mathcal{R}_0$ , and HIT for  
212 all states are provided in SI Table S2. These estimates are based on state-specific marginal posteriors for  
213 the parameter  $\beta$  of our compartmental model. State-specific MAP estimates and 95% credible intervals  
214 for  $\beta$  (and other adjustable model parameters) are given in SI Table S1. As can be seen (e.g., in Fig 3),  
215 our  $\lambda$  estimates are consistent with early case reporting data during the exponential takeoff phase of disease  
216 transmission.

#### 217 **Sensitivity of $\beta$ to the surveillance data used in inference**

218 For each state, we used data from January 21 to June 21, 2020 to infer the MAP estimate of  $\beta$  (and  
219 the values of the other region-specific adjustable model parameters). Thus, our estimates are derived from  
220 a particular subset of the available surveillance data. To check the robustness of MAP estimates for  $\beta$  to  
221 variations in training data, we performed a sensitivity analysis wherein we inferred  $\beta$  using data collected  
222 over three distinct periods in 2020: 1) January 21 to May 21, 2) January 21 to June 21, and 3) January 21  
223 to July 21. By visualizing our estimates with a rank order plot (Fig 4) and conducting pairwise two-sample  
224 Kolmogorov-Smirnov tests (38), we found that the 4-, 5-, and 6-month training datasets yielded estimates  
225 for  $\beta$  that were not statistically significantly different from each other. The MAP estimates for  $\beta$  obtained

226 using the 4-, 5-, and 6-month datasets are listed in SI Table S3. We assessed sensitivity by computing the  
227 relative error between the  $\beta$  estimates obtained from the 5-month dataset and the average  $\beta$  estimate over  
228 all datasets considered. We found that none of the state-level MAP estimates for  $\beta$  showed sensitivity  
229 (i.e., a relative error exceeding 100% in magnitude) to variations in the training data (SI Table S4). The  
230 largest relative error was 12% (for Kansas).

### 231 **Global asymptotic stability of the disease-free equilibrium**

232 The model of Lin et al. (22) has a globally asymptotically stable disease-free equilibrium (DFE) if  
233  $\mathcal{R}_0 < 1$ , which can be deduced by following the approach of Shuai and van den Driessche (39). As a  
234 consequence, the model predicts that the epidemic will be extinguished as the system dynamics are  
235 attracted to the DFE.

236 To confirm that the model behaves as expected around the HIT, we conducted a perturbation  
237 analysis for the states of New York (Figs 5A and 5B) and Washington (Figs 5C and 5D). We simulated  
238 disease dynamics starting from an arbitrarily chosen initial condition near the HIT number of persons,  $S_h$ ,  
239 given by the following formula:  $S_h = \text{HIT} \times S_0$ , where  $S_0$  denotes the population size of the region  
240 considered. We defined the size of our perturbation as  $\varepsilon = 0.2 \times S_h$  for Figs 5A and 5C and as  $\varepsilon =$   
241  $-0.2 \times S_h$  for Figs 5B and 5D. The initial condition was  $S_0 - S_h - 1 + \varepsilon$  susceptible persons, 1 infected  
242 person, and  $S_h - \varepsilon$  recovered persons. As expected, for  $S_h < \text{HIT} \times S_0$  (Figs 5A and 5C), the number of  
243 infectious persons grows over time, whereas for  $S_h > \text{HIT} \times S_0$  (Figs 5B and 5D), the number of  
244 infectious persons decays over time.

### 245 **Progress toward herd immunity**

246 From our state-specific HIT estimates and other information (discussed below), we were able to  
247 calculate percent progress toward herd immunity for each state (Fig 6, SI Table S5). We estimated the

248 percent progress of each state's population toward herd immunity,  $\mathcal{P} \in [0\%, 100\%]$ , using the following  
249 equation (the derivation of which is given in the SI):

$$250 \quad \mathcal{P} \equiv (\varepsilon_v(1 - f_r)f_v + \varepsilon_r f_r) \left(1 - \frac{1}{Y_{\text{Delta}}\mathcal{R}_0}\right)^{-1} \times 100\% \quad [2]$$

251 where  $\mathcal{R}_0$  is the population-specific basic reproduction number that we estimated for ancestral strains (SI  
252 Table S2),  $Y_{\text{Delta}}$  is a multiplier that accounts for the increased transmissibility of SARS-CoV-2 variant  
253 Delta,  $f_r$  denotes the fraction of the population with immunity acquired through infection,  $f_v$  is the fraction  
254 of the population that has been vaccinated (24),  $\varepsilon_r$  is the fraction of infected persons who are protected  
255 against productive infection (i.e., an infection that can be transmitted to others), and  $\varepsilon_v$  is the fraction of  
256 vaccinated persons who are protected against productive infection. Recall that we use  $Y_{\text{Delta}} = 2.46$  (27-  
257 28). We estimate that  $\varepsilon_r = 1.0$  (40) and  $\varepsilon_v = 0.66$  (41). We obtain four different estimates for  $f_r$  as  
258 follows. In the first case, we obtain  $f_r$  as the cumulative number of detected cases within a population  
259 divided by the population size. In the second case, we adjust our previous estimate for  $f_r$  by a multiplier  
260 of 5.8 (42). In other words, we assume that the true disease burden is 5.8 times higher than the detected  
261 number of cases. In the third case, we obtain  $f_r$  as the fraction of the population that has been infected  
262 according to the latest serological survey results reported online at Ref. (25). In the fourth case, we assume  
263  $f_r = f_{r,0}/(1 - f_A)$ , where  $f_{r,0}$  denotes the estimate of seroprevalence in a given region and  $f_A$  denotes the  
264 fraction of all cases that are asymptomatic. With this approach, we are assuming that asymptomatic cases  
265 are not detected in serological testing (43). We adopt the estimate of Lin et al. (22) that  $f_A = 0.44$ .

266 As can be seen in Fig 6C, which is based on case reporting data, 18 of the 50 states have reached  
267 herd immunity. However, in Fig 6D, which is based on serological survey data, none of the states have  
268 reached herd immunity. South Dakota is closest to herd immunity, with 84% of the immune persons  
269 required for herd immunity. Idaho is furthest from herd immunity, with 45% of the immune persons  
270 required for herd immunity. The mean (median) progress toward herd immunity, across all states, is 63%

271 (63%).

## 272 **Discussion**

273 One of our most important findings is quantification of how COVID-19 transmissibility, in terms  
274 of the basic reproduction number  $\mathcal{R}_0$ , varies across the 50 US states. The MAP value of  $\mathcal{R}_0$  for ancestral  
275 strains of SARS-CoV-2 ranges from 2.3 for Wyoming to 7.1 for New Jersey. The population-weighted  
276 mean for the US is 4.7. These estimates indicate that the herd immunity threshold (HIT) for the Delta  
277 variant of SARS-CoV-2 ranges from 82% to 94%, assuming that Delta is 2.46 times more transmissible  
278 than ancestral strains. The uncertainty in each  $\mathcal{R}_0$  estimate was quantified: 95% credible intervals are  
279 indicated in Figure 4. The 95% credible intervals for ancestral HIT estimates are given in SI Table S2.  
280 Because we can estimate the relative effort required to reach herd immunity across the US (in terms of  
281 HIT), resources for vaccination campaigns can be targeted to those areas where it is more difficult to  
282 achieve herd immunity.

283 Our  $\mathcal{R}_0$  and HIT estimates differ from estimates given in previous studies. For example, various  
284 researchers derived point estimates for  $\mathcal{R}_0$  from data using tools from time-series analysis, without  
285 assuming an underlying mechanistic model (13, 15). These tools depend on slope estimation and thus can  
286 be expected to depend sensitively on noise and errors in early case-reporting data. Ives and Bozzuto (16)  
287 provided state-level estimates for  $\mathcal{R}_0$  (in 36 states), and Fellows et al. (17) used a Bayesian framework to  
288 obtain state-level estimates for  $\mathcal{R}_0$  (in all 50 states). For the 30 states that are considered in Ives and  
289 Bozzuto (16), Fellows et al. (17), Milicevic et al. (18), and the present study, our estimates for  $\mathcal{R}_0$  were  
290 most similar to those of Milicevic et al. (18) (SI Table S6). Milicevic et al. (18) provided state-level  $\mathcal{R}_0$   
291 point estimates (for 45 states) that are statistically consistent with our MAP estimates of  $\mathcal{R}_0$  for ancestral  
292 strains of SARS-CoV-2. The main points of difference between these earlier studies and the present study  
293 are as follows. Our  $\mathcal{R}_0$  and HIT estimates were obtained from a model consistent with new case-reporting

294 data, as illustrated in Figs 1 and 3. We were able to provide estimates for all 50 states (Fig 4, SI Table S2),  
295 and we were able to obtain a Bayesian quantification of the uncertainty in each estimate (Fig 4, SI Table  
296 S2).

297 In the face of Delta, the estimates of Fig6C (based on case reporting data) suggest that a majority  
298 of states have yet to achieve herd immunity, and the estimates of Fig 6D (based on serological survey  
299 results) suggest that no state in the US has achieved herd immunity as of September 20, 2021. In either  
300 case, persons in the US lacking immunity are still at risk (44). The perspective provided by Fig 6D is  
301 consistent with the study of Moghadas et al. (45) indicating that only 62% of persons in the US had some  
302 form of immunity as of July 15, 2021 (either through infection or vaccination). Given that the percentage  
303 of immune persons required for herd immunity according to Fig 6D ranges from 84% for South Dakota  
304 to 45% for Idaho (Fig 6D) ~20 months (counting from January 2020) into the COVID-19 pandemic and  
305 ~9 months after vaccines became widely available, it seems that this situation will persist for months, if  
306 not years. How can the US accelerate the approach to herd immunity?

307 Policies that encourage infection of children and vaccinated persons who have healthy immune  
308 systems may be rationalized because such persons seem to be well-protected against severe (but not mild)  
309 disease (46) and infected persons seem to have greater protection against productive infection (40).  
310 However, this approach has obvious drawbacks, starting with the risks of infection. Another is that non-  
311 immune persons may not be able to self-identify as such. Unfortunately, it seems that we cannot rely on  
312 currently available vaccines to stop community transmission. Delta-adjusted HITs are mathematically  
313 impossible to achieve through vaccination alone because these HITs are close to 1 (SI Table S2) and  
314 vaccine protection against productive infection is imperfect (i.e.,  $\varepsilon_v$  is significantly less than 1) (41). Thus,  
315 use of Delta-targeted vaccines may be needed to accelerate the approach to herd immunity and to minimize  
316 COVID-19 impacts.

317 One potential benefit of our comprehensive state-level  $\mathcal{R}_0$  estimates is that they quantify how  
318 differences in social structure and contact patterns across the US—the factors presumably underlying the  
319 spatial heterogeneity in  $\beta$  and  $\mathcal{R}_0$ —influence the spread of an aerosol-transmitted virus (47-48). This  
320 information, by identifying the regions in the US where transmission is likely to be highest, could be  
321 useful for responding to future pandemics caused by viruses similar to SARS-CoV-2.

322 Our study has several notable limitations. Our HIT estimates are potentially biased downward  
323 because of general awareness within the US of the impacts of COVID-19 in other countries (e.g., China  
324 and Italy), which could have resulted in a fraction of the US population changing their behaviors to protect  
325 themselves from COVID-19 before the start of the local epidemic. In addition, our estimation of percent  
326 progress toward herd immunity crucially depends on seroprevalence estimates of the true disease burden.  
327 These estimates are associated with some uncertainty (49-51). As illustrated in Fig 6, percent progress  
328 toward herd immunity is underestimated if serological tests fail to detect all cases of infection. The reader  
329 must also be cautioned that our analysis depends on a number of assumptions. For example, we considered  
330 a compartmental model in which populations are taken to be well-mixed and to lack age structure. This is  
331 clearly a simplification. More refined estimates could be obtained by making the model more realistic, but  
332 this would have the drawback of increasing the complexity of inference, which at some point would make  
333 inference impracticable.

#### 334 **Author contributions**

335 A.M., R.G.P, Y.T.L., and W.S.H. designed research; A.M., J.N., E.F.M., Y.C., R.G.P., Y.T.L., and W.S.H.  
336 performed research; A.M., J.N., Y.T.L., and W.S.H. analyzed data; and A.M. and W.S.H. wrote the paper.

#### 337 **Acknowledgements**

338 A.M. was supported by the 2020 Mathematical Sciences Graduate Internship program, which is sponsored  
339 by the Division of Mathematical Sciences of the National Science Foundation. E.F.M, J.N., Y.C., R.G.P,

340 and W.S.H. were supported by NIH/NIGMS Grant R01GM111510. Y.T.L. was supported by the  
341 Laboratory Directed Research and Development (LDRD) program at Los Alamos National Laboratory.  
342 Computational resources for this study consisted of the FARM cluster, a Linux-based supercomputing  
343 cluster for the University of California at Davis, and Northern Arizona University’s Monsoon cluster,  
344 which is funded by Arizona’s Technology and Research Initiative Fund.

## 345 **References**

- 346 1. J. Gee *et al.*, First month of COVID-19 vaccine safety monitoring—United States, December 14,  
347 2020-January 13, 2021. *MMWR Morb Mortal Wkly Rep.* **70**, 283-288 (2021).
- 348 2. National Center for Immunization and Respiratory Diseases (NCIRD), Data from Centers for  
349 Disease Control and Prevention (CDC). [https://data.cdc.gov/Vaccinations/COVID-19-Vaccinations-](https://data.cdc.gov/Vaccinations/COVID-19-Vaccinations-in-the-United-States-Jurisdi/unsk-b7fc)  
350 [in-the-United-States-Jurisdi/unsk-b7fc](https://data.cdc.gov/Vaccinations/COVID-19-Vaccinations-in-the-United-States-Jurisdi/unsk-b7fc). Accessed 20 September 2021.
- 351 3. P. Fine, K. Eames, D. L. Heymann, “Herd immunity”: a rough guide. *Clin Infect Dis.* **7**, 911-916  
352 (2011).
- 353 4. B. Ridenhour, J. M. Kowalik, D. K. Shay, Unraveling  $R_0$ : Considerations for public health  
354 applications. *Am J Public Health.* **108**, S445-S454 (2018).
- 355 5. L. Temime *et al.*, A conceptual discussion about the basic reproduction number of severe acute  
356 respiratory syndrome coronavirus 2 in healthcare settings. *Clin Infect Dis.*, **72**, 141-143 (2021).
- 357 6. J. M. Dan *et al.*, Immunological memory to SARS-CoV-2 assessed for up to 8 months after  
358 infection. *Science.* **371**, eabf4063 (2021).
- 359 7. C.-J. Yu *et al.*, Assessment of basic reproductive number for COVID-19 at global level: A meta-  
360 analysis. *Medicine.* **100**, e25837 (2021).
- 361 8. A. J. Kucharski *et al.*, Early dynamics of transmission and control of COVID-19: a mathematical  
362 modelling study. *Lancet.* **20**, 553-558 (2020).
- 363 9. R. Li *et al.*, Substantial undocumented infection facilitates the rapid dissemination of novel  
364 coronavirus (SARS-CoV-2). *Science.* **368**, 489-493 (2020).
- 365 10. L. Ferretti *et al.*, Quantifying SARS-CoV-2 transmission suggests epidemic control with digital  
366 contact tracing. *Science.* **368**, eabb6936 (2020).
- 367 11. M. D’Arienzo, A. Coniglio, Assessment of the SARS-CoV-2 basic reproduction number,  $\mathcal{R}_0$ , based  
368 on the early phase of COVID-19 outbreak in Italy. *Biosaf Health.* **2**, 57-59 (2020).
- 369 12. Sanche *et al.*, High contagiousness and rapid spread of severe acute respiratory syndrome  
370 coronavirus 2. *Emerg Infect Dis.* **26**, 1470-1477 (2020).
- 371 13. E. O. Romero-Severson, N. Hengartner, G. Meadors, R. Ke, Change in global transmission rates of  
372 COVID-19 through May 6 2020. *PLOS ONE.* **15**, e0236776 (2020).
- 373 14. R. Ke, E. O. Romero-Severson, S. Sanche, N. Hengartner, Estimating the reproductive number  $\mathcal{R}_0$   
374 of SARS-CoV-2 in the United States and eight European countries and implications for vaccination.  
375 *J Theor Biol.* **517**, 110621 (2021).
- 376 15. J. D. Kong, E. W. Tekwa, S. A. Gignoux-Wolfsohn, Social, economic, and environmental factors  
377 influencing the basic reproduction number of COVID-19 across countries. *PLOS ONE.* **16**,  
378 e0252373 (2021).



- 379 16. A. R. Ives, C. Bozzuto, State-by-State estimates of  $R_0$  at the start of COVID-19 outbreaks in the  
380 USA. medRxiv [Preprint] (2020).  
381 <https://www.medrxiv.org/content/10.1101/2020.05.17.20104653v3> (accessed 4 September 2021).
- 382 17. I. E. Fellows, R. B. Slayton, A. J. Hakim, The COVID-19 pandemic, community mobility and the  
383 effectiveness of non-pharmaceutical interventions: The United States of America, February to May  
384 2020. arXiv [Preprint] (2020). <https://arxiv.org/abs/2007.12644> (accessed 8 September 2021).
- 385 18. O. Milicevic *et al.*,  $PM_{2.5}$  as a major predictor of COVID-19 basic reproduction number in the USA.  
386 *Environmental Research*. **201**, 111526 (2021).
- 387 19. A. R. Ives, C. Bozzuto, Estimating and explaining the spread of COVID-19 at the county level in the  
388 USA. *Commun Biol*. **4**, 1-9 (2021).
- 389 20. K. T. Sy, L. F. White, B. E. Nichols, Population density and basic reproductive number of COVID-  
390 19 across United States counties. *PLOS ONE*. **16**, e0249271 (2021).
- 391 21. C. S. Weissert, M. J. Uttermark, K. R. Mackie, A. Artilles, Governors in control: Executive orders,  
392 state-local preemption, and the COVID-19 pandemic. *Publius*. **51**, 396-428 (2021).
- 393 22. Y. T. Lin *et al.*, Daily forecasting of regional epidemics of coronavirus disease with bayesian  
394 uncertainty quantification. *Emerg Infect Dis*. **27**, 767-778 (2021).
- 395 23. The New York Times COVID-19 Data Team, Data from The New York Times.  
396 <https://github.com/nytimes/covid-19-data>. Accessed 20 September 2021.
- 397 24. The Covid Act Now COVID-19 Data Team, Data from Covid Act Now.  
398 <https://covidactnow.org/data-api>. Accessed 20 September 2021.
- 399 25. Surveillance Review and Response Group, Data from Centers for Disease Control and Prevention  
400 (CDC). <https://covid.cdc.gov/covid-data-tracker/#national-lab>. Accessed 20 September 2021.
- 401 26. K. L. Bajema *et al.*, Estimated SARS-CoV-2 Seroprevalence in the US as of September 2020.  
402 *JAMA*. **181**, 450-460 (2021).
- 403 27. H. Fort, A very simple model to account for the rapid rise of the alpha variant of SARS-CoV-2 in  
404 several countries and the world. *Virus Res*. **304**, 198531 (2021).
- 405 28. H. Allen *et al.*, Increased household transmission of COVID-19 cases associated with SARS-CoV-2  
406 Variant of Concern B.1.617.2: a national case-control study. (2021).  
407 <https://khub.net/documents/135939561/405676950/Increased+Household+Transmission+of+COVID-19+Cases+-+national+case+study.pdf/7f7764fb-ecb0-da31-77b3-b1a8ef7be9aa> (accessed 9 July  
408 2021).
- 409 29. P. Virtanen *et al.*, SciPy 1.0: fundamental algorithms for scientific computing in Python. *Nat*  
410 *Methods*. **17**, 261-272 (2020).
- 411 30. L. Petzold, Automatic selection of methods for solving stiff and nonstiff systems of ordinary  
412 differential equations. *SIAM J. Sci. Comput*. **4**, 136-148 (1983).
- 413 31. M. L. Blinov, J. R. Faeder, B. Goldstein, W. S. Hlavacek, BioNetGen: software for rule-based  
414 modeling of signal transduction based on the interactions of molecular domains. *Bioinformatics*. **20**,  
415 3289-3291 (2004).
- 416 32. S. D. Cohen, CVODE, a stiff/nonstiff ODE solver in C. *Computers in physics*. **10**, 138-143 (1996).
- 417 33. S. K. Lam, A. Pitrou, S. Seibert, "Numba: A LLVM-based Python JIT compiler" in *Proceedings of*  
418 *the Second Workshop on the LLVM Compiler Infrastructure in HPC*, (Association for Computing  
419 Machinery, New York, NY, 2015), pp. 1-6.
- 420 34. O. Diekmann, J. A. Heesterbeek, M. G. Roberts, The construction of next-generation matrices for  
421 compartmental epidemic models. *J R Soc Interface*. **7**, 873-875 (2010).
- 422

- 423 35. Wolfram S., *Mathematica: A System for Doing Mathematics by Computer* (Addison Wesley  
424 Longman Publishing Co., Inc., Boston, MA, 1991).
- 425 36. H. J. Wearing, P. Rohani, M. J. Keeling. Appropriate models for the management of infectious  
426 diseases. *PLoS Med.* **7**, e174 (2005).
- 427 37. E. D. Mitra *et al.*, PyBioNetFit and the Biological Property Specification Language. *iScience.* **19**,  
428 1012-1036 (2019).
- 429 38. F. J. Massey, The Kolmogorov-Smirnov test for goodness of fit. *J. Am. Stat. Assoc.* **46**, 68-78 (1951).
- 430 39. Z. Shuai, P. van den Driessche, Global stability of infectious disease models using Lyapunov  
431 functions, *SIAM J. Appl. Math.* **73**, 1513-1532 (2013).
- 432 40. I. Dorigatti *et al.*, SARS-CoV-2 antibody dynamics and transmission from community-wide  
433 serological testing in the Italian municipality of Vo'. *Nat Commun.* **12**, 1-11 (2021).
- 434 41. A. Fowlkes *et al.*, Effectiveness of COVID-19 vaccines in preventing SARS-CoV-2 infection among  
435 frontline workers before and during B.1.617.2 (Delta) variant predominance—eight US locations,  
436 December 2020-August 2021. *MMWR Morb Mortal Wkly Rep.* **70**, 1167-1169 (2021).
- 437 42. H. Kalish *et al.*, Undiagnosed SARS-CoV-2 seropositivity during the first 6 months of the COVID-  
438 19 pandemic in the United States. *Sci. Transl. Med.* **13**, eabh3826 (2021).
- 439 43. S. Takahashi, B. Greenhouse, I. Rodríguez-Barraquer, Are seroprevalence estimates for severe acute  
440 respiratory syndrome coronavirus 2 biased?, *J Infect. Dis.* **222**, 1772-1775 (2020).
- 441 44. H. E. Randolph, L. B. Barreiro, Herd immunity: understanding COVID-19. *Immunity.* **5**, 737-741  
442 (2020).
- 443 45. S. M. Moghadas, P. Sah, A. Shoukat, L. A. Meyers, A. P. Galvani, Population immunity against  
444 COVID-19 in the United States. *Ann Intern Med.* doi:10.7326/M21-2721 (2021).
- 445 46. Science Brief: COVID-19 vaccines and vaccination. (2021). [https://www.cdc.gov/coronavirus/2019-  
446 ncov/science/science-briefs/fully-vaccinated-people.html](https://www.cdc.gov/coronavirus/2019-ncov/science/science-briefs/fully-vaccinated-people.html) (accessed 8 Sep 2021).
- 447 47. V. Stadnytskyi, C. E. Bax, A. Bax, P. Anfinrud, The airborne lifetime of small speech droplets and  
448 their potential importance in SARS-CoV-2 transmission. *Proc Natl Acad Sci U.S.A.* **117**, 11875-  
449 11877 (2020).
- 450 48. M. Echternach *et al.* Impulse dispersion of aerosols during singing and speaking: A potential  
451 COVID-19 transmission pathway. *Am J Respir Crit Care Med.* **202**, 1584-1587 (2020).
- 452 49. D. B. Larremore, B. K. Fosdick, S. Zhang, Y. H. Grad. Jointly modeling prevalence, sensitivity and  
453 specificity for optimal sample allocation. bioRxiv [Preprint] (2020).  
454 <https://www.biorxiv.org/content/10.1101/2020.05.23.112649v1> (accessed 8 September 2021).
- 455 50. A. Gelman, B. Carpenter. Bayesian analysis of tests with unknown specificity and sensitivity. *J R*  
456 *Stat Soc Ser C Appl Stat.* **69**, 1269-1283 (2020).
- 457 51. E. Bendavid *et al.*, COVID-19 antibody seroprevalence in Santa Clara County, California. *Int J*  
458 *Epidemiol.* **50**, 410-419 (2021).

459  
460  
461  
462  
463  
464  
465  
466

467  
468  
469  
470  
471  
472  
473  
474

**Table 1.** Maximum *a posteriori* (MAP) estimates and 95% credible intervals for epidemic parameters ( $\beta$ ,  $\lambda$ ,  $\mathcal{R}_0$ , HIT, and Delta-adjusted HIT) for the states of New Jersey, Wyoming, Florida, and Alaska.

| State      | $\beta$ ( $d^{-1}$ ) | $\lambda$ ( $d^{-1}$ )* | $\mathcal{R}_0$ ** | HIT***           | Delta-adjusted HIT**** |
|------------|----------------------|-------------------------|--------------------|------------------|------------------------|
| New Jersey | 0.65 (0.59-0.71)     | 0.45 (0.41-0.48)        | 7.1 (6.4-7.7)      | 0.86 (0.84-0.87) | 0.94 (0.94-0.95)       |
| Wyoming    | 0.21 (0.21-0.23)     | 0.13 (0.13-0.15)        | 2.3 (2.3-2.5)      | 0.56 (0.56-0.59) | 0.82 (0.82-0.84)       |
| Florida    | 0.55 (0.48-0.59)     | 0.39 (0.34-0.41)        | 6.0 (5.2-6.4)      | 0.83 (0.81-0.84) | 0.93 (0.92-0.94)       |
| Alaska     | 0.21 (0.21-0.23)     | 0.13 (0.13-0.14)        | 2.3 (2.3-2.5)      | 0.56 (0.56-0.59) | 0.82 (0.82-0.84)       |

475  
476  
477  
478  
479  
480

In this analysis, we used surveillance data (daily reports of new cases) available from 21-January-2020 to 21-June-2020 (inclusive dates) to estimate parameter values through Bayesian inference. \*Computed as described in SI. \*\*Calculated using Eq. 1. \*\*\*Obtained through the relation  $HIT = 1 - 1/\mathcal{R}_0$ . \*\*\*\*Based on Delta being 2.46 times more infectious than ancestral strains.

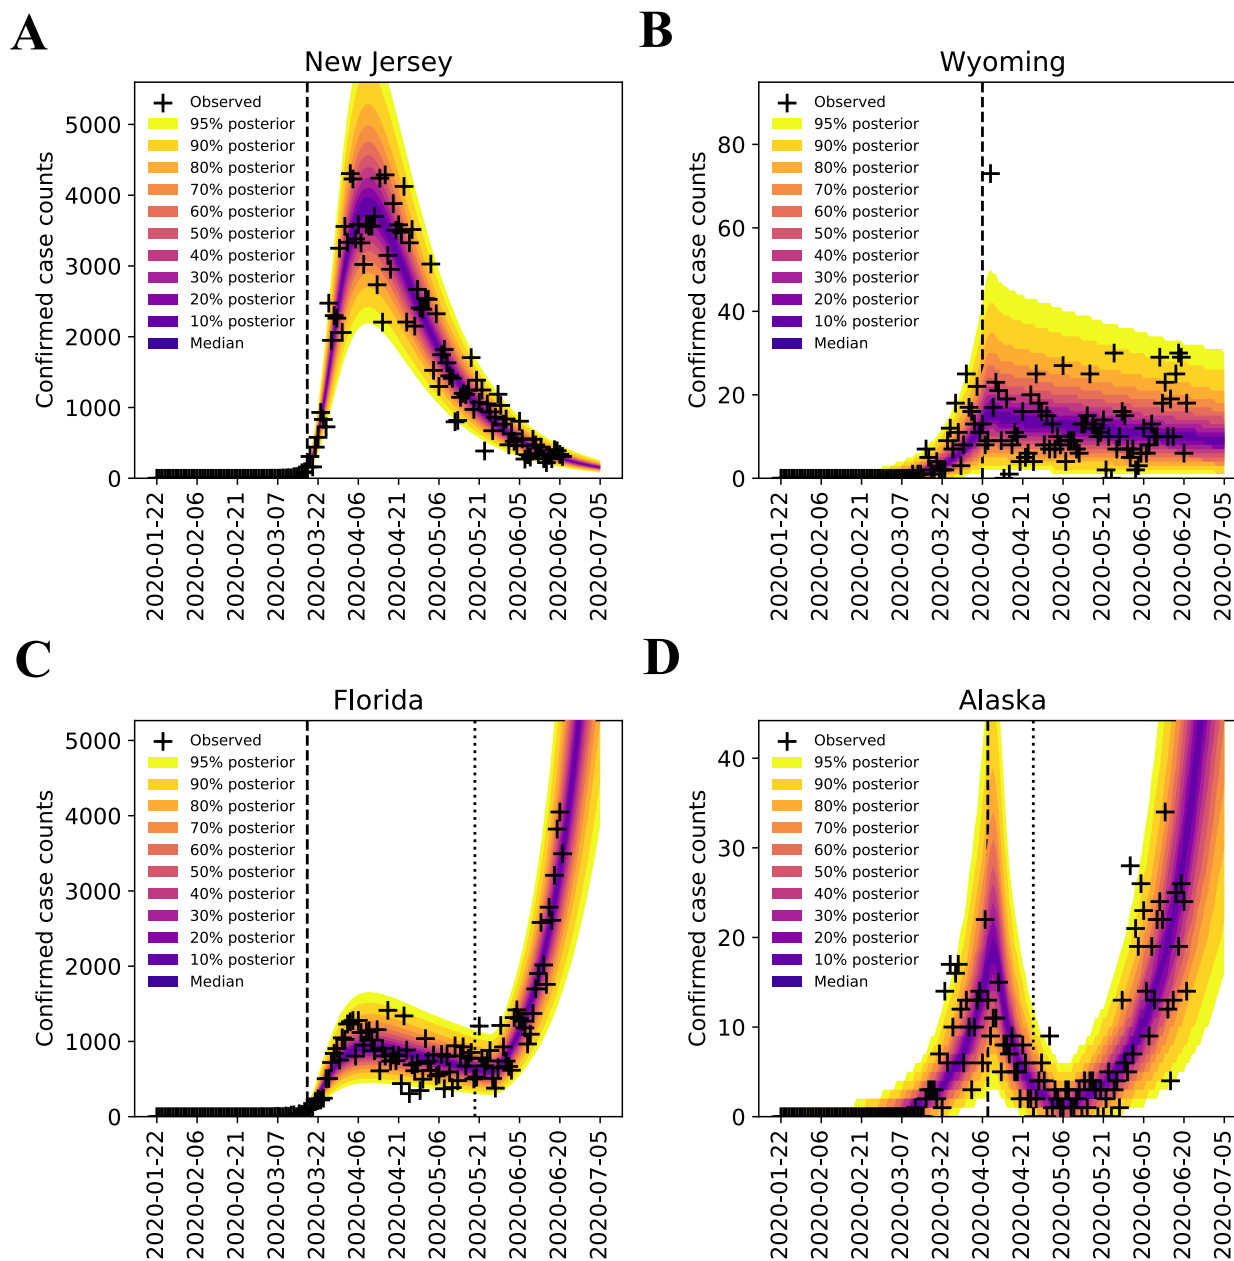

481  
482  
483  
484  
485  
486  
487  
488  
489  
490  
491

**Figure 1.** Bayesian predictive inferences for daily confirmed case counts of COVID-19 in (A) New Jersey (B) Wyoming (C) Florida (D) Alaska, from January 21 to June 21, 2020 (inclusive dates). The compartmental model (22) accounts for an initial social distancing period followed by  $n$  additional periods. We considered  $n = 0, 1$  and  $2$  and selected the best  $n$  using the model selection procedure of Lin et al. (22). Plus signs indicate daily case reports. The shaded region indicates the prediction uncertainty and inferred noise in detection of new cases. The color-coded bands within the shaded region indicate the median and different credible intervals (e.g., dark purple band corresponds to the median, the band with lightest shade of yellow corresponds to the 95% credible interval, and gradations of color between these two extremes correspond to different credible intervals as indicated in the legend). In each panel, the

492 vertical broken line indicates the onset time of the first social-distancing period. For states with  $n = 1$   
493 (Alaska and Florida), there is an additional broken line, which indicates the onset time of the second  
494 social-distancing period. The model was used to make forecasts of new case detection for 14 days after  
495 June 21, 2020. The last prediction date was July 5, 2020.

496  
497  
498  
499  
500  
501  
502  
503  
504  
505  
506  
507  
508  
509  
510  
511  
512  
513  
514  
515  
516  
517  
518  
519  
520  
521  
522  
523  
524  
525  
526  
527  
528  
529  
530  
531  
532  
533  
534  
535  
536  
537

538  
539  
540

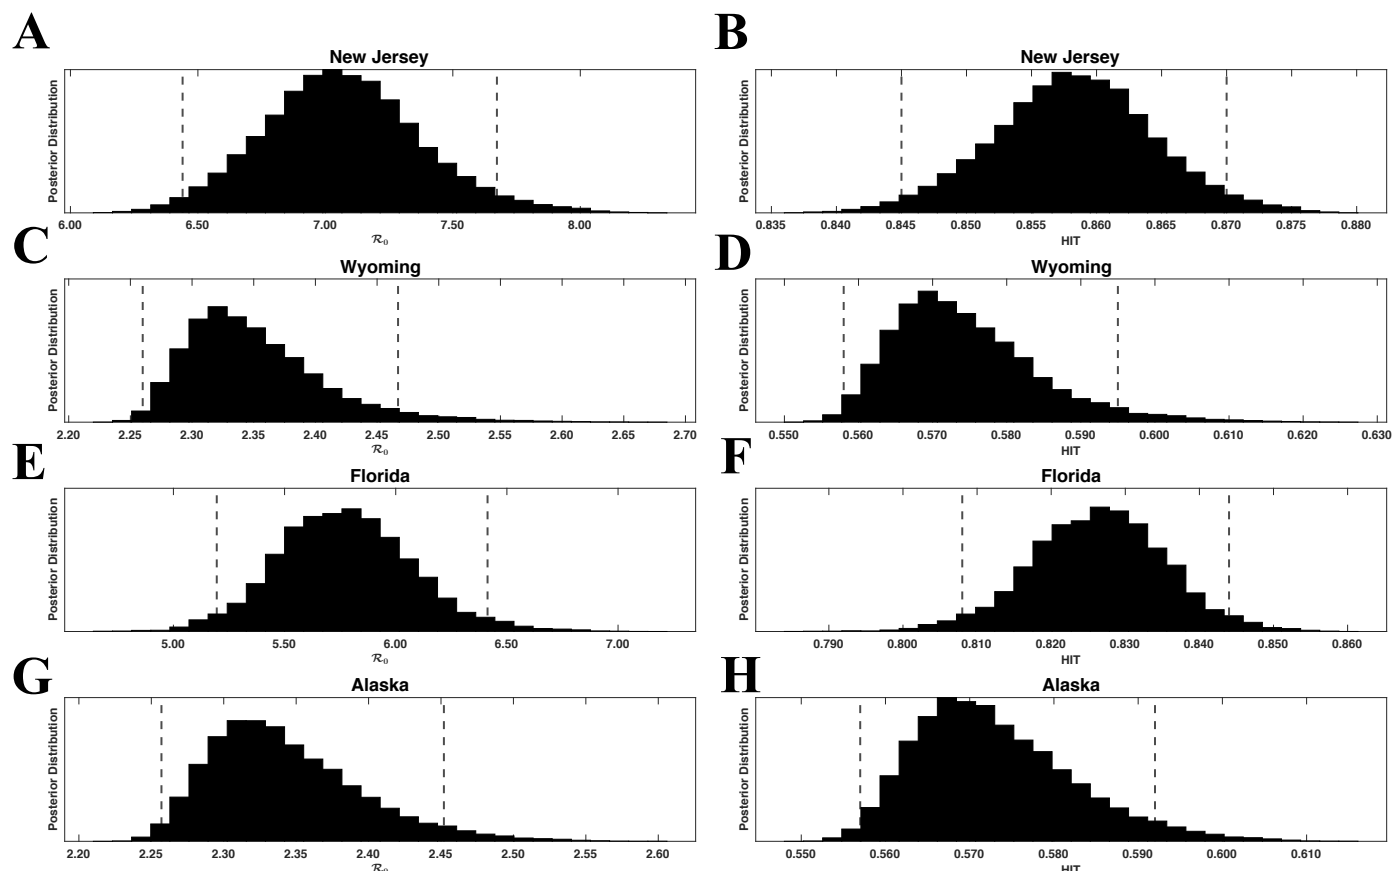

541

542

543 **Figure 2.** Marginal posterior distributions of  $\mathcal{R}_0$  (left panels) and HIT (right panels) for ancestral strains  
544 of SARS-CoV-2 in four US states: (A, B) New Jersey, (C, D) Wyoming, (E, F) Florida, and (G, H) Alaska.  
545 Inferences are based on daily reports of new cases from January 21 to June 21, 2020. Each  $\mathcal{R}_0$  posterior  
546 was obtained from the corresponding marginal posterior for  $\beta$  and Eq. 1. Each HIT posterior was obtained  
547 from the relation  $\text{HIT} = 1 - 1/\mathcal{R}_0$  and the corresponding marginal posterior for  $\mathcal{R}_0$ . The 95% credible  
548 intervals for  $\mathcal{R}_0$  are as follows: (6.44, 7.67) for New Jersey, (2.26, 2.47) for Wyoming, (5.20, 6.41) for  
549 Florida, and (2.26, 2.45) for Alaska. The 95% credible intervals for the HIT estimates are as follows:  
550 (0.84, 0.87) for New Jersey, (0.56, 0.59) for Wyoming, (0.81, 0.84) for Florida, and (0.56, 0.59) for  
551 Alaska. For each panel, the endpoints of the corresponding credible interval are indicated with vertical  
552 broken lines.

553

554

555

556

557

558

559

560

561

562

563  
564

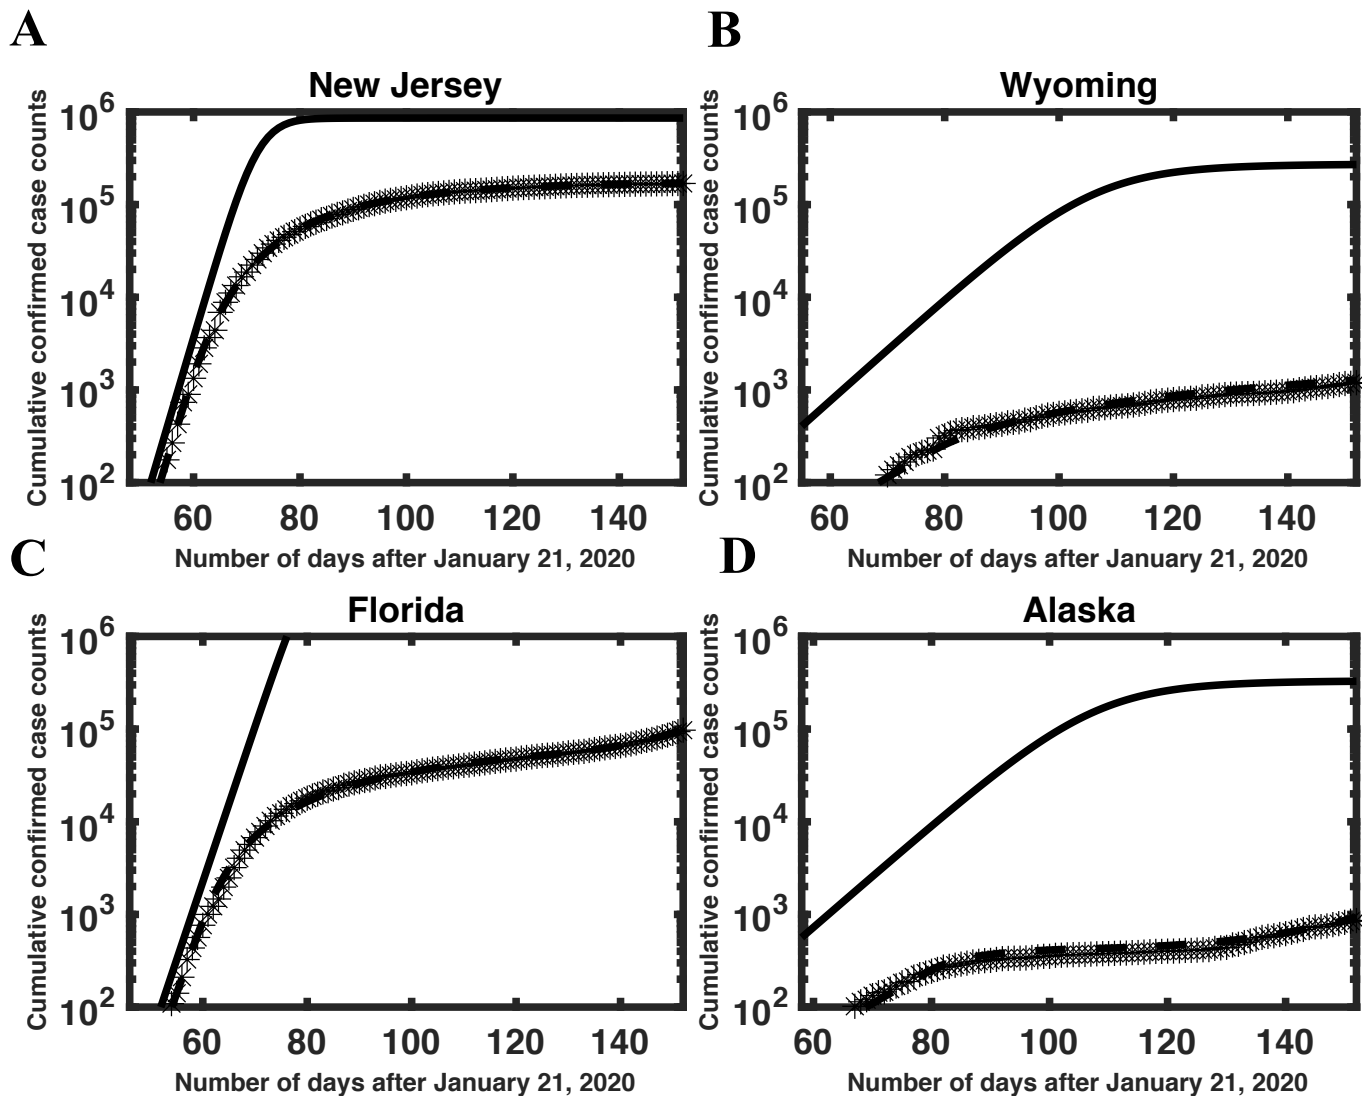

565

566

567 **Figure 3.** Consistency of model-derived  $\lambda$  estimates with empirical growth rates during initial exponential  
568 increase in disease incidence in (A) New Jersey, (B) Wyoming, (C) Florida, and (D) Alaska. In each panel,  
569 the initial slope of the solid curve corresponds to  $\lambda$  (calculated as described in Materials and Methods),  
570 the crosses indicate empirical cumulative case counts, and the broken line is the model prediction based  
571 on MAP estimates for adjustable parameters. The solid curve is derived from the reduced model (Eqs. 1-  
572 8 in the SI). This curve shows cumulative case counts had there not been any interventions to limit disease  
573 transmission. As can be seen, the initial slopes of the solid and broken curves are comparable. We selected  
574  $n = 0$  for New Jersey and Wyoming and  $n = 1$  for Florida and Alaska. Among 35 states with  $n = 0$ , New  
575 Jersey has the largest inferred  $\lambda$  value (0.45) and Wyoming has the smallest inferred  $\lambda$  value (0.13). Among  
576 15 states with  $n = 1$ , Florida has the largest inferred value of  $\lambda$  (0.39) and Alaska has the smallest inferred  
577 value of  $\lambda$  (0.13). It should be noted that, in contrast with Fig 1, the y-axis here indicates cumulative (vs.  
578 daily) number of cases on a logarithmic (vs. linear) scale.  
579

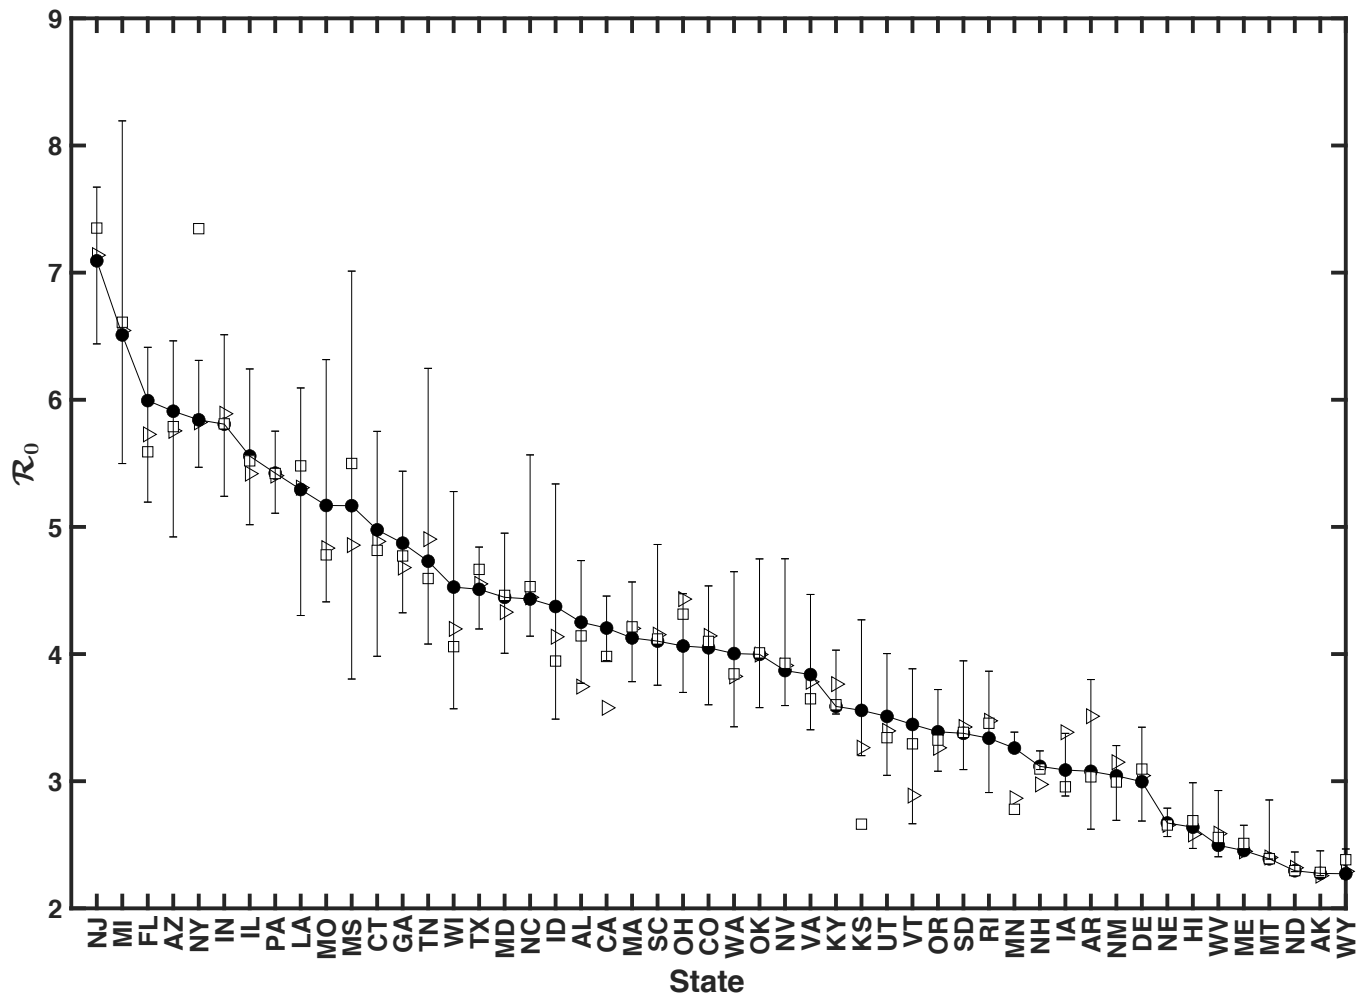

580  
 581 **Figure 4.** MAP estimates of the basic reproduction number  $\mathcal{R}_0$  for ancestral strains of SARS-CoV-2 in  
 582 all 50 US states. The different symbols refer to different training datasets used to estimate  $\mathcal{R}_0$ . Open  
 583 triangles correspond to surveillance data collected from January 21 to May 21, 2020, filled circles  
 584 correspond to surveillance data collected from January 21 to June 21, 2020, and open squares correspond  
 585 to surveillance data collected from January 21 to July 21, 2020. Estimates of  $\mathcal{R}_0$  are sorted by state from  
 586 largest to smallest values according to the  $\mathcal{R}_0$  estimates derived from the surveillance data collected for  
 587 January 21 to June 21, 2020. The whiskers associated with each filled circle indicates the 95% credible  
 588 interval (inferred from the 5-month dataset). States are indicated using two-letter US postal service state  
 589 abbreviations (<https://about.usps.com/who-we-are/postal-history/state-abbreviations.pdf>).

590  
 591  
 592  
 593  
 594  
 595  
 596  
 597  
 598  
 599  
 600



601  
602  
603

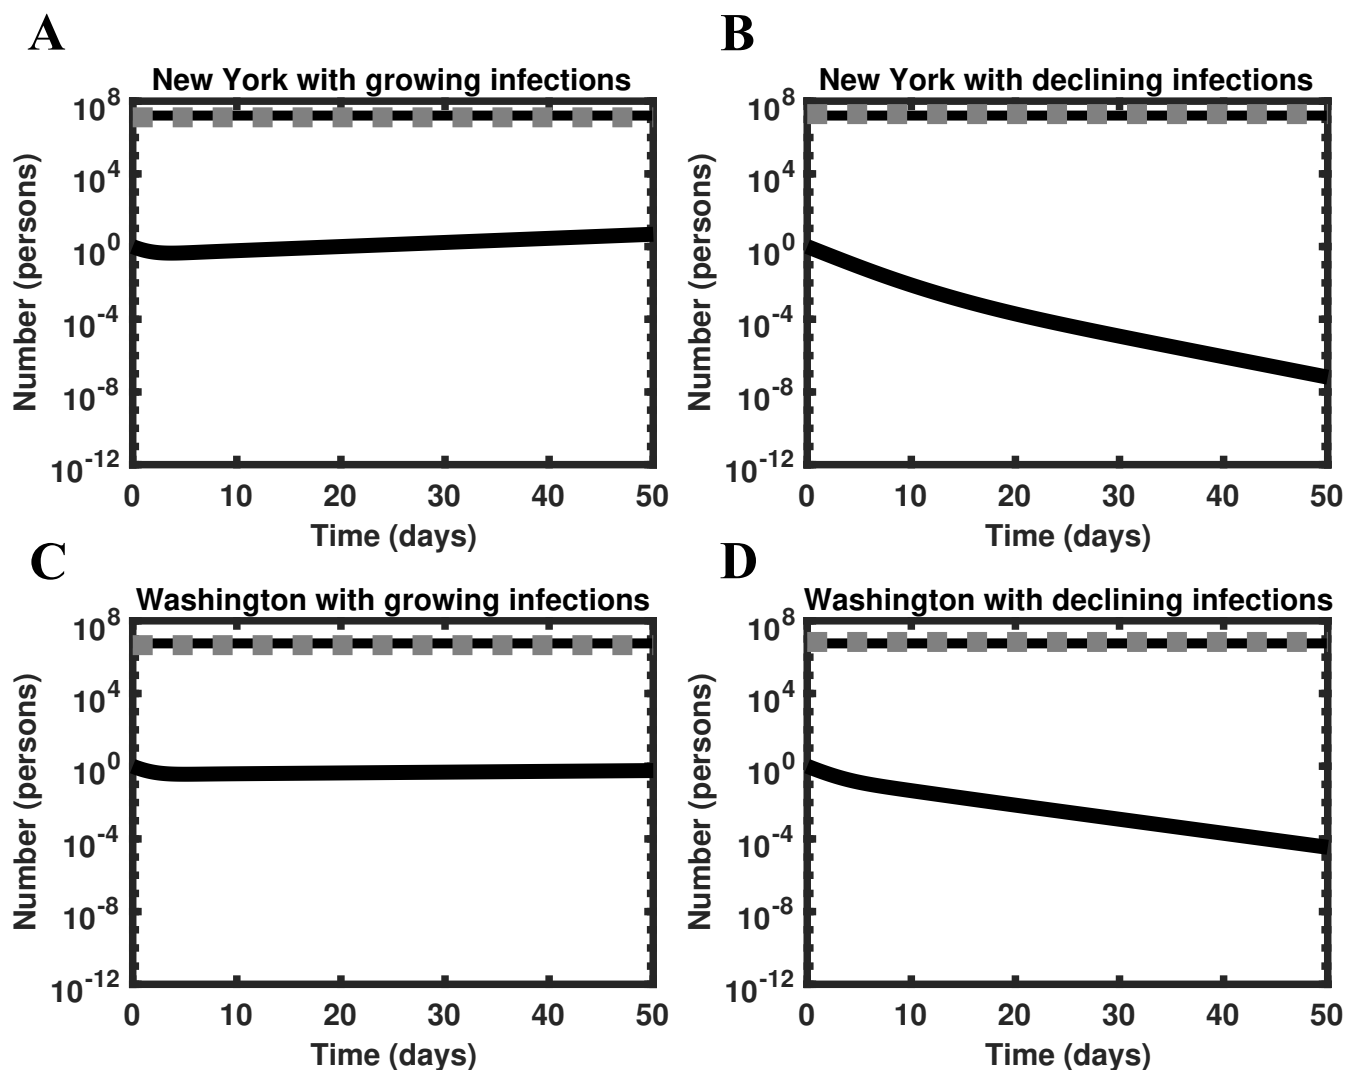

604

605  
606  
607  
608  
609  
610  
611  
612  
613  
614  
615  
616  
617  
618  
619  
620  
621

**Figure 5.** Perturbation analysis using the full model of Lin et al. (22) for the states of New York (panels A and B) and Washington (panels C and D). In each panel, the black solid line represents the number of infectious persons (initially 1), the black broken line represents the threshold number of persons required for herd immunity (i.e.,  $S_h$ ), and the gray broken line represents the number of recovered persons (initially  $S_h - \epsilon$ , obtained as described in Results). Simulations are based on MAP estimates for model parameters obtained using surveillance data collected from January 21 to June 21, 2020.

622  
623

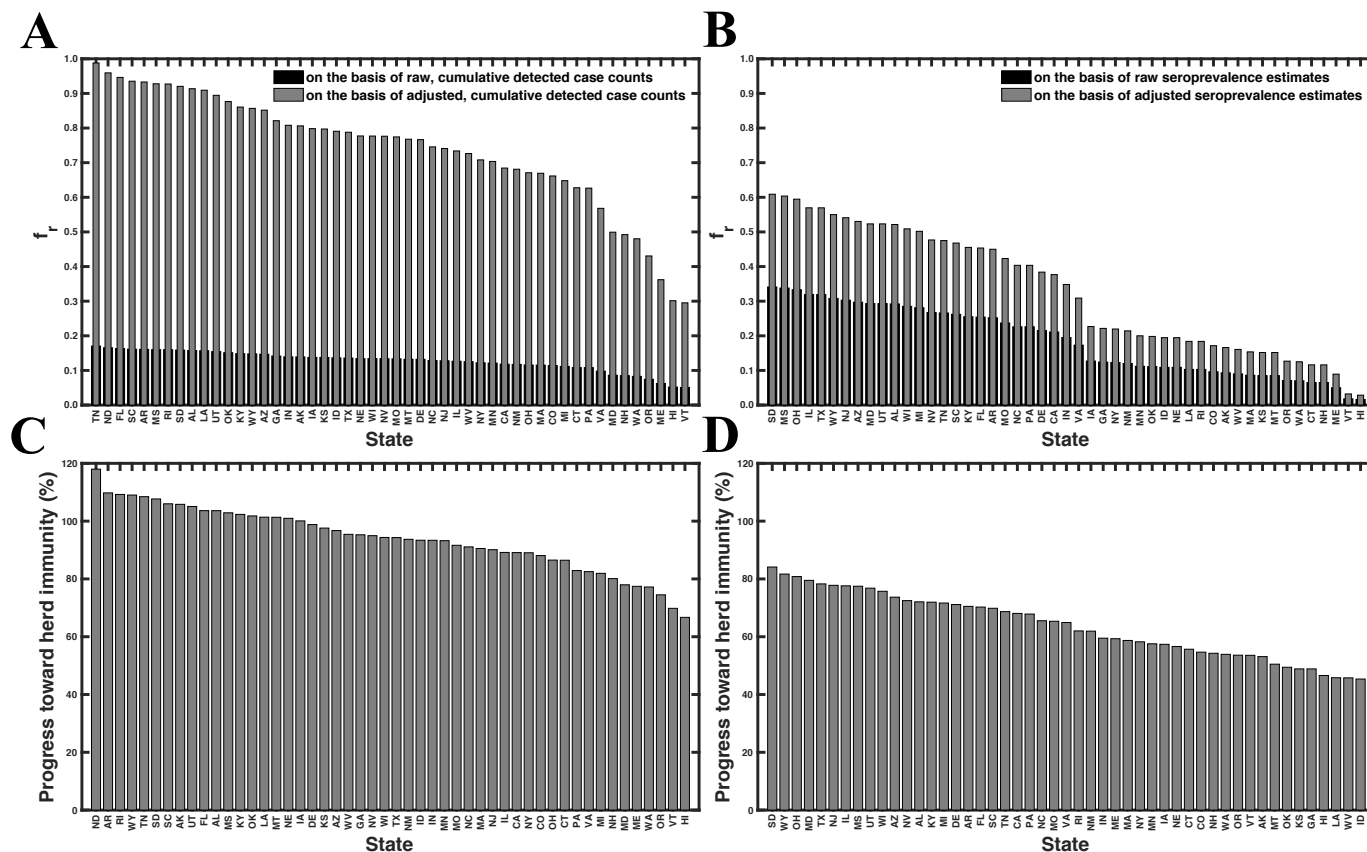

624 **Figure 6.** Percent progress toward herd immunity in each of the 50 US states. Percent progress  $\mathcal{P}$  indicates  
 625 the fraction of immune persons required for herd immunity.  $\mathcal{P}$  was calculated using Eq. 2. Black bars  
 626 (Panel A) correspond to the first scenario (i.e.,  $f_r$  estimated as the number of detected cases divided by  
 627 population size), gray bars (Panels A and C) correspond to the second scenario (i.e.,  $f_r$  estimated as the  
 628 number of detected cases within a population divided by the population size, adjusted for lack of detection  
 629 of undiagnosed SARS-CoV-2 infections), black bars (Panel B) correspond to the third scenario (i.e.,  $f_r$   
 630 given by seroprevalence survey results), and gray bars (Panels B and D) correspond to the fourth scenario  
 631 (i.e.,  $f_r$  given by seroprevalence survey results adjusted for lack of detection of asymptomatic cases).  
 632 Estimates for  $\mathcal{P}$  are sorted by state from largest to smallest values according to the second scenario (Panels  
 633 A and C) and the fourth scenario (Panels B and D). North Dakota was omitted from Panels B and D  
 634 because a recent estimate of seroprevalence was not available at Ref. (25). States are indicated using two-  
 635 letter US postal service state abbreviations (<https://about.usps.com/who-we-are/postal-history/state-abbreviations.pdf>).  
 636

1  
2  
3  
4  
5  
6  
7  
8  
9  
10  
11  
12  
13  
14  
15  
16  
17  
18  
19  
20  
21

# **Bayesian Inference of State-Level COVID-19 Basic Reproduction Numbers across the United States Supplementary Information**

Abhishek Mallela<sup>a</sup>, Jacob Neumann<sup>b,1</sup>, Ely F. Miller<sup>b</sup>, Ye Chen<sup>c</sup>, Richard G. Posner<sup>b</sup>, Yen Ting Lin<sup>d</sup>,  
and William S. Hlavacek<sup>e,2\*</sup>

<sup>a</sup>Department of Mathematics, University of California, Davis, CA 95616

<sup>b</sup>Department of Biological Sciences, Northern Arizona University, Flagstaff, AZ 86001

<sup>c</sup>Department of Mathematics and Statistics, Northern Arizona University, Flagstaff, AZ 86001

<sup>d</sup>Computer, Computational and Statistical Sciences Division, Los Alamos National Laboratory, Los Alamos, NM 87545

<sup>e</sup>Theoretical Division, Los Alamos National Laboratory, Los Alamos, NM 87545

<sup>1</sup>Current address: Department of Chemistry and Chemical Biology, Cornell University, Ithaca, NY 14853

<sup>2</sup>To whom correspondence may be addressed. Email: [wish@lanl.gov](mailto:wish@lanl.gov)

22

## 23 **Reduced Model**

24 We derive  $\mathcal{R}_0$  from a simplified form of the compartmental model of Lin et al. (1). The reduced  
25 model is obtained by omitting variables and terms for interventions, including social distancing,  
26 quarantine, and self-isolation. Thus, the reduced model describes disease transmission dynamics in the  
27 absence of interventions. The equations of the reduced model are as follows:

$$28 \quad \frac{dS}{dt} = -\frac{\beta S}{S_0} [I + \rho_E(E_2 + E_3 + E_4 + E_5) + \rho_A A], \quad [1]$$

$$29 \quad \frac{dE_1}{dt} = \frac{\beta S}{S_0} [I + \rho_E(E_2 + E_3 + E_4 + E_5) + \rho_A A] - k_L E_1, \quad [2]$$

$$30 \quad \frac{dE_i}{dt} = k_L(E_{i-1} - E_i), \text{ for } i = 2, 3, \dots, m \quad [3]$$

$$31 \quad \frac{dA}{dt} = f_A k_L E_m - c_A A, \quad [4]$$

$$32 \quad \frac{dI}{dt} = (1 - f_A) k_L E_m - c_I I, \quad [5]$$

$$33 \quad \frac{dH}{dt} = f_H c_I I - c_H H, \quad [6]$$

$$34 \quad \frac{dR}{dt} = c_A A + (1 - f_H) c_I I + f_R c_H H, \quad [7]$$

$$35 \quad \frac{dD}{dt} = (1 - f_R) c_H H, \quad [8]$$

36 where  $t$  denotes time,  $\beta$ ,  $S_0$ ,  $\rho_E$ ,  $\rho_A$ ,  $k_L$ ,  $f_A$ ,  $f_H$ ,  $f_R$ ,  $c_A$ ,  $c_I$ , and  $c_H$  are positive-valued time-invariant  
37 parameters, as defined in Lin et al. (1), and  $m$  denotes the number of stages taken to comprise the  
38 incubation period. Here and in the study of Lin et al. (1),  $m = 5$ . The values of  $\beta$  (a rate constant  
39 characterizing disease transmission) and  $S_0$  (the total population) are taken to be region-specific; the other  
40 parameters have values that are taken to be universal (i.e., applicable to all regions of interest). The  
41 variable  $S$  denotes the population of susceptible persons. The variables  $E_1$  to  $E_m$  denote populations of  
42 exposed persons, e.g., persons incubating virus but not symptomatic. As noted earlier, the incubation  
43 period is divided into  $m$  stages. The variable  $A$  denotes the population of persons who have progressed

44 through the incubation period but will never develop symptoms (i.e., persons with asymptomatic  
45 infections). The variable  $I$  denotes the population of persons with mild symptomatic disease. The variable  
46  $H$  denotes the population of persons with severe disease who are hospitalized or isolated at home. The  
47 variable  $R$  denotes the population of recovered persons, and the variable  $D$  denotes the population of  
48 deceased persons.

### 49 **Basic Reproduction Number**

50 The basic reproduction number,  $\mathcal{R}_0$ , is defined as the number of secondary infections caused by  
51 an infected person during the entire period of infectiousness when introduced into a population consisting  
52 of susceptible persons only and there are no interventions to limit disease transmission. Here, we use the  
53 next-generation matrix method to compute  $\mathcal{R}_0$  (2). The model has a disease-free equilibrium (DFE)  $x_0$   
54 with  $S = S_0$ , where  $S_0$  is the total population and the remaining populations ( $E_1, E_2, \dots, E_m, A, I, H, R, D$ )  
55 are equal to 0.

56 To use the next-generation matrix method, we let  $x = (E_1, E_2, E_3, E_4, E_5, A, I)$  denote the vector of  
57 state variables corresponding to compartments containing infected persons. For each infected  
58 compartment  $i$ , we define  $f_i$  as the rate of entry of newly infected persons into compartment  $i$  and  $v_i$  as  
59 the net transfer of persons out of the  $i^{th}$  compartment. Then, we have  $dx_i/dt = f_i(x) - v_i(x)$ . Now, we  
60 let  $F$  and  $V$  denote the Jacobians of  $f$  and  $v$  evaluated at the disease-free equilibrium  $x_0$ . The  $(i, j)$  entry  
61 of the matrix  $F$  is the rate at which infected persons in the  $j^{th}$  compartment produce a new infection in the  
62  $i^{th}$  compartment. The  $(j, k)$  entry of the matrix  $V^{-1}$  is the expected amount of time that a person  
63 introduced to the  $k^{th}$  compartment will spend in a single visit to the  $j^{th}$  compartment. The matrix  $F$ , which  
64 is non-negative, is defined as follows:

65

$$F \equiv \begin{pmatrix} 0 & \rho_E \beta & \rho_E \beta & \rho_E \beta & \rho_E \beta & \rho_A \beta & \beta \\ 0 & 0 & 0 & 0 & 0 & 0 & 0 \\ 0 & 0 & 0 & 0 & 0 & 0 & 0 \\ 0 & 0 & 0 & 0 & 0 & 0 & 0 \\ 0 & 0 & 0 & 0 & 0 & 0 & 0 \\ 0 & 0 & 0 & 0 & 0 & 0 & 0 \\ 0 & 0 & 0 & 0 & 0 & 0 & 0 \end{pmatrix}$$

66 The matrix  $V$ , which is non-singular (i.e., invertible), is defined as follows:

67

$$V \equiv \begin{pmatrix} k_L & 0 & 0 & 0 & 0 & 0 & 0 \\ -k_L & k_L & 0 & 0 & 0 & 0 & 0 \\ 0 & -k_L & k_L & 0 & 0 & 0 & 0 \\ 0 & 0 & -k_L & k_L & 0 & 0 & 0 \\ 0 & 0 & 0 & -k_L & k_L & 0 & 0 \\ 0 & 0 & 0 & 0 & -f_A k_L & c_A & 0 \\ 0 & 0 & 0 & 0 & -(1 - f_A)k_L & 0 & c_I \end{pmatrix}$$

68 We find  $\mathcal{R}_0$  as the spectral radius (i.e., the dominant eigenvalue) of the matrix  $FV^{-1}$  (2), which is given  
69 by Eq. 1 in the main text.

## 70 Epidemic growth rate

71 The epidemic growth rate  $\lambda$  is defined as the dominant eigenvalue of the Jacobian of the reduced  
72 model linearized at the disease-free equilibrium (DFE). Thus,  $\lambda$  is the largest root of the characteristic  
73 polynomial for the 7-dimensional Jacobian matrix  $J$ , which is equivalent to  $F - V$ . We used the  
74 *CharacteristicPolynomial* function in Mathematica (3) to find  $J$ :

$$75 \quad p_J(x) = \beta(1 - f_A)k_L^5(c_A + x) + [\beta f_A k_L^5 \rho_A + (c_A + x)(-k_L^5 + 4\beta k_L^4 \rho_E - 5k_L^4 x + 6\beta k_L^3 \rho_E x - \\ 76 \quad 10k_L^3 x^2 + 4\beta k_L^2 \rho_E x^2 - 10k_L^2 x^3 + \beta k_L \rho_E x^3 - 5k_L x^4 - x^5)](c_I + x) \quad [9]$$

77 The largest root was found numerically. Solutions were based on state-specific estimates for  $\beta$  and the  
78 estimates of Lin et al. (1) for other parameters in Eq. 9.

## 79 Progress toward herd immunity

80 In this section, we explain the assumptions and derive the formula for our metric of progress  
81 toward herd immunity (Eq. 2 in the main text). First, we define the variables used in our analysis. For a

82 given region,  $S_0$  denotes the total population size,  $N_d$  denotes the cumulative number of cases detected,  
 83  $N_a$  denotes the cumulative number of asymptomatic cases,  $N_v$  denotes the cumulative number of  
 84 vaccinations completed,  $N_{v,s}$  denotes the number of persons who were susceptible at the time of  
 85 vaccination,  $N_{v,r}$  denotes the number of persons who had recovered from infection at the time of  
 86 vaccination,  $N_c$  denotes the cumulative number of all cases,  $\varepsilon_v$  denotes the fraction of vaccinated  
 87 individuals protected from productive infection (i.e., an infection that can be transmitted to others),  $\varepsilon_r$   
 88 denotes the fraction of recovered individuals protected from productive infection,  $N_r$  denotes the number  
 89 of individuals who have recovered from infection, HIT denotes the herd immunity threshold for ancestral  
 90 strains,  $Y_{\text{Delta}}$  denotes the infectiousness of SARS-CoV-2 variant Delta relative to ancestral strains,  $S_h \equiv$   
 91  $\text{HIT} \times S_0$  denotes the threshold number of persons with immunity needed for herd immunity (in the face  
 92 of ancestral strains),  $S_i$  denotes the estimated number of persons with immunity,  $f_A \equiv N_a/N_c$  denotes the  
 93 fraction of all cases that are asymptomatic,  $f_r \equiv N_r/S_0$  denotes the fraction of the population with  
 94 immunity acquired through infection, and  $f_v \equiv N_v/S_0$  denotes the fraction of the population that has been  
 95 vaccinated.

96 We assume that  $S_0$  is constant. We take  $N_r = N_c$  to be a good approximation. We assume that we  
 97 know  $S_0, N_d$ , and  $N_v$ . We assume that susceptible and recovered individuals have the same probability of  
 98 being vaccinated. From our assumption that susceptible and recovered individuals have the same  
 99 probability of being vaccinated, it follows that  $N_{v,s} = (1 - f_r)N_v$  and  $N_{v,r} = f_r N_v$ . These relations are  
 100 consistent with  $N_v \equiv N_{v,s} + N_{v,r}$ . The number of individuals with immunity (protection from productive  
 101 infection) is given by

$$102 \quad S_i = \varepsilon_v N_{v,s} + \varepsilon_r N_r = \varepsilon_v (1 - f_r) N_v + \varepsilon_r N_r \quad [10]$$

103 We assume that  $Y_{\text{Delta}}$  gives the value of  $\beta$  for SARS-CoV-2 variant Delta relative to  $\beta$  for ancestral  
 104 strains. We assume all other model parameters are the same for Delta. Thus,  $Y_{\text{Delta}} \mathcal{R}_0$  is the basic

105 reproduction number in the face of Delta. We define  $\mathcal{P}$ , percent progress toward herd immunity, as

106 
$$\mathcal{P} = \frac{S_i}{S_0} \left( 1 - \frac{1}{Y_{\text{Delta}} \mathcal{R}_0} \right)^{-1} \times 100\%$$

107 Using the expression given above for  $S_i$  (Eq. 10),  $1 - 1/(Y_{\text{Delta}} \mathcal{R}_0)$  as the Delta-adjusted HIT, and  $S_h =$   
108  $\text{HIT} \times S_0$ , we find Eq. 2 in the main text.

## 109 SI Figure Legends

110 **Figure S1.** Consistency of results obtained from different codes used to perform Markov chain Monte  
111 Carlo (MCMC) sampling. Shown here are 1-dimensional marginal posteriors of parameters for Wyoming  
112 ( $n = 0$ ) derived using the Python code of Lin et al. (1) (blue) and PyBioNetFit (4) (red).

113  
114 **Figure S2.** Markov chain log-likelihood trace plots for each of the 50 US states. Bayesian inference was  
115 conditioned on the compartmental model of Lin et al. (1). Bayesian inference was performed as described  
116 by Lin et al. (1) except that training data consisted of daily COVID-19 case counts for states (vs. case  
117 counts for metropolitan statistical areas). The compartmental model accounts for an initial social  
118 distancing period followed by  $n$  additional periods. We considered  $n = 0, 1$  and  $2$  and selected the best  $n$   
119 using the model selection procedure described by Lin et al. (1). The number of epochs (or iterations) used  
120 for each state was chosen so that convergence was achieved in each case. Inferences are based on daily  
121 reports of new cases of COVID-19 from January 21 to June 21, 2020.

122  
123 **Figure S3.** Parameter trace plots for each of the 50 US states. These parameter trace plots are matched to  
124 the likelihood trace plots of Fig S2. It should be noted that the number of parameters varies across the  
125 states depending on the selected value of  $n$ . See the caption of Fig S2 for additional details.

126  
127 **Figure S4.** Matrix of 1- and 2-dimensional marginalizations of the posterior samples obtained for the  
128 adjustable parameters associated with the compartmental model for each of the 50 US states. Inferences  
129 are based on daily reports of new cases of COVID-19 from January 21 to June 21, 2020. Plots of marginal  
130 posteriors (1-dimensional marginalizations) are shown on the diagonal from top left to bottom right. Other  
131 plots are 2-dimensional marginalizations (presented as histograms) indicating the correlations between  
132 parameter estimates. Brightness indicates higher probability density. A compact bright area indicates low  
133 correlation. An extended, asymmetric bright area indicates high correlation. The pairs plots shown here  
134 are matched to the trace plots of Figs S3 and S4. See the caption of Fig S2 for additional details.

135  
136 **Figure S5.** Posterior predictive checking. The time-dependent predictive posterior distribution for daily  
137 number of COVID-19 cases detected is visualized for all states except New Jersey, Wyoming, Florida,  
138 and Alaska, which are considered in Fig 1 of the main text. Inferences are based on daily reports of new  
139 COVID-19 cases from January 21 to June 21, 2020 (inclusive dates). The compartmental model (1)  
140 accounts for an initial social distancing period followed by  $n$  additional periods. We considered  $n = 0, 1$   
141 and  $2$  and selected the best  $n$  using the model selection procedure of Lin et al. (1). Crosses indicate  
142 observed daily case reports. The shaded region indicates the prediction uncertainty and inferred noise in  
143 detection of new cases. The color-coded bands within the shaded region indicate the median and different  
144 credible intervals (e.g., dark purple corresponds to the median, the lightest shade of yellow corresponds  
145 to the 95% credible interval, and gradations of color between these two extremes correspond to different



146 credible intervals as indicated in the legend). In each panel, the vertical broken line indicates the onset  
147 time of the first social-distancing period. For states with  $n = 1$ , there is an additional (rightmost) broken  
148 line, which indicates the onset time of the second social-distancing period. The model was used to make  
149 forecasts of new case detection for 14 days after June 21, 2020. The last prediction date was July 5, 2020.

150  
151 **Figure S6.** Consistency of model-derived  $\lambda$  estimates with empirical growth rates during initial  
152 exponential increase in disease incidence in 46 states of the US (i.e., excluding New Jersey, Wyoming,  
153 Florida, and Alaska; see Fig 3 in the main text). In each panel, the initial slope of the solid curve  
154 corresponds to  $\lambda$  (calculated as described in Materials and Methods), the crosses indicate empirical  
155 cumulative case counts, and the broken line is the model prediction based on MAP estimates for adjustable  
156 parameters. The solid curve is derived from the reduced model (Eqs. 1-8 in the SI). This curve shows  
157 cumulative case counts had there not been any interventions to limit disease transmission. As can be seen,  
158 the initial slopes of the solid and broken curves are comparable. It should be noted that, in contrast with  
159 Fig S5, the y-axis here indicates cumulative (vs. daily) number of cases on a logarithmic (vs. linear) scale.  
160

## 161 **References**

- 162 1. Y. T. Lin *et al.*, Daily forecasting of regional epidemics of coronavirus disease with bayesian  
163 uncertainty quantification. *Emerg Infect Dis.* **27**, 767-778 (2021).
- 164 2. O. Diekmann, J. A. Heesterbeek, M. G. Roberts, The construction of next-generation matrices for  
165 compartmental epidemic models. *J R Soc Interface.* **7**, 873-875 (2010).
- 166 3. Wolfram S., *Mathematica: A System for Doing Mathematics by Computer* (Addison Wesley  
167 Longman Publishing Co., Inc., Boston, MA, 1991).
- 168 4. E. D. Mitra *et al.*, PyBioNetFit and the biological property specification language. *iScience.* **19**,  
169 1012-1036 (2019).
